# Supplementary material for: IL-15 promotes activation and expansion of CD8+ T cells in HIV-1 infection
Source: JCI journal article supplement (doi:10.1172/jci85996), 2016-06-19

**Supplementary Figure 1.** Co-expression of CD71 and Ki67 in peripheral blood cells of an HIV-1 infected patient (A). Spearman correlation between CD71 expression and Ki67 expression in PBMCs obtained from 10 healthy controls and 10 HIV-1 infected patients. C) Sorting strategy to obtain cycling and non-cycling memory CD8 T cells for CDR3 deep sequencing.

**Supplementary Figure 2.** Spearman correlations between lymph node IL-15 expression and (A) plasma HIV-1 RNA levels in untreated patients or (B) peripheral blood CD8 T cell count in healthy controls or (C) ART-treated patients.

Supplementary Figure 1

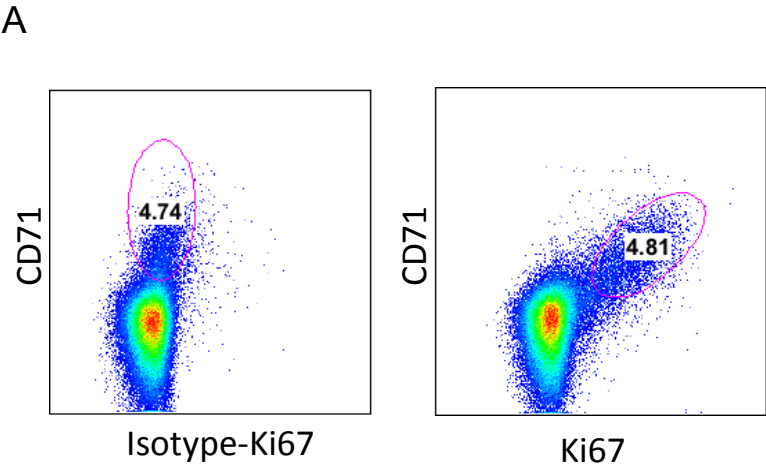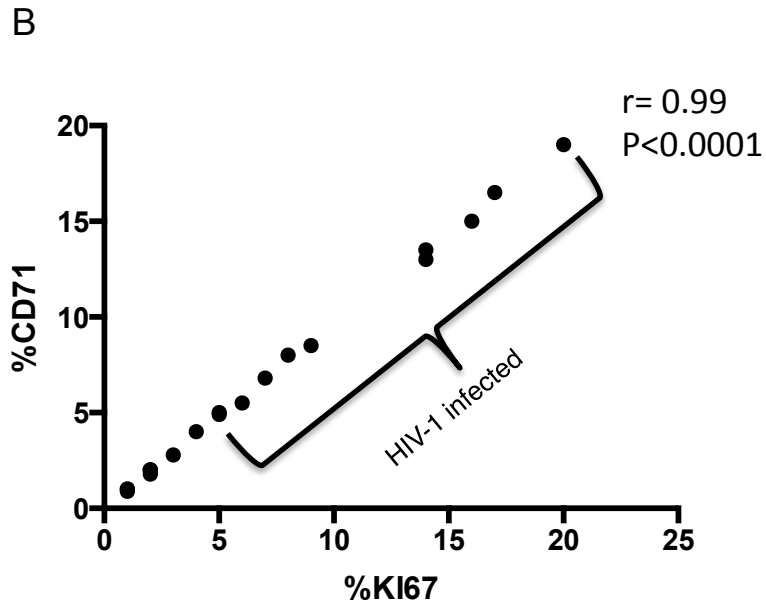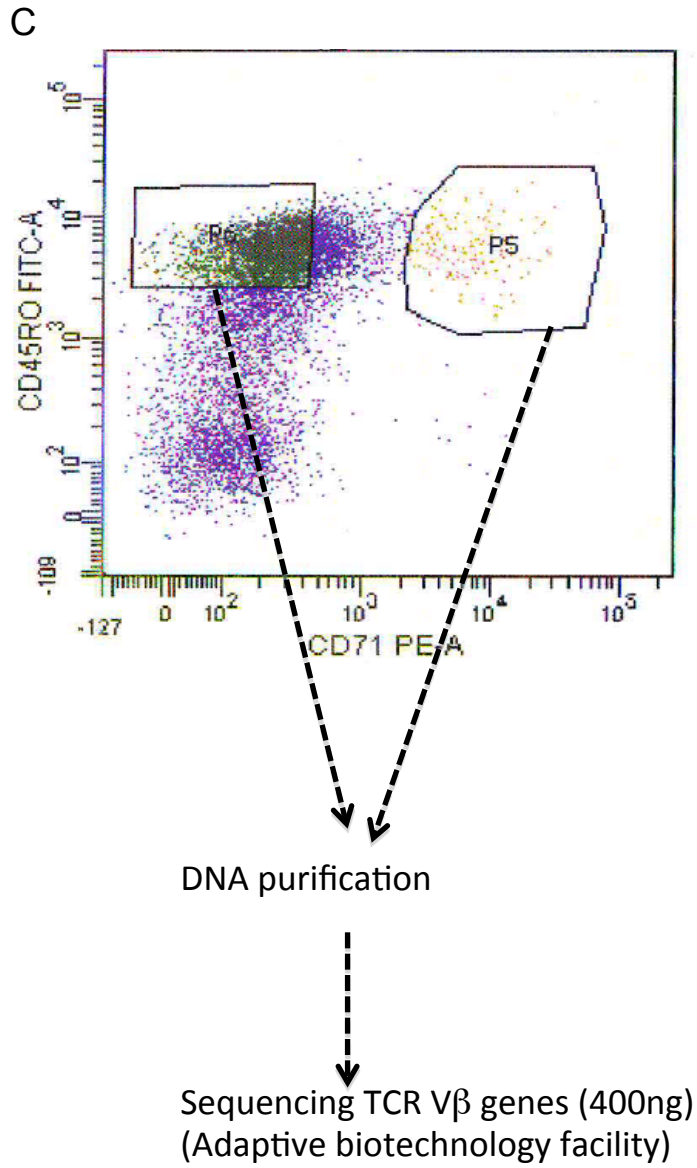

Supplementary Figure 2

A

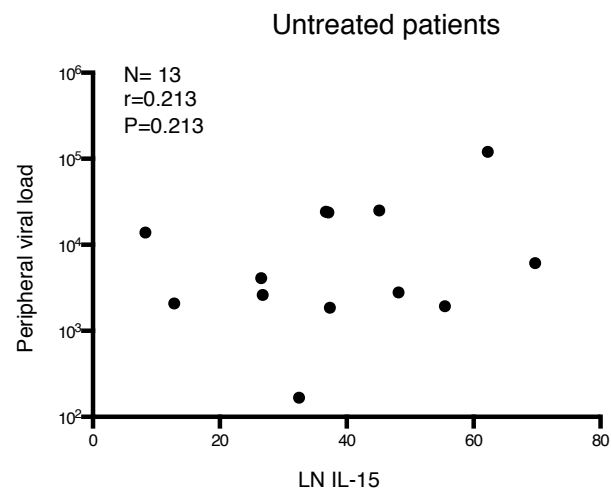

B

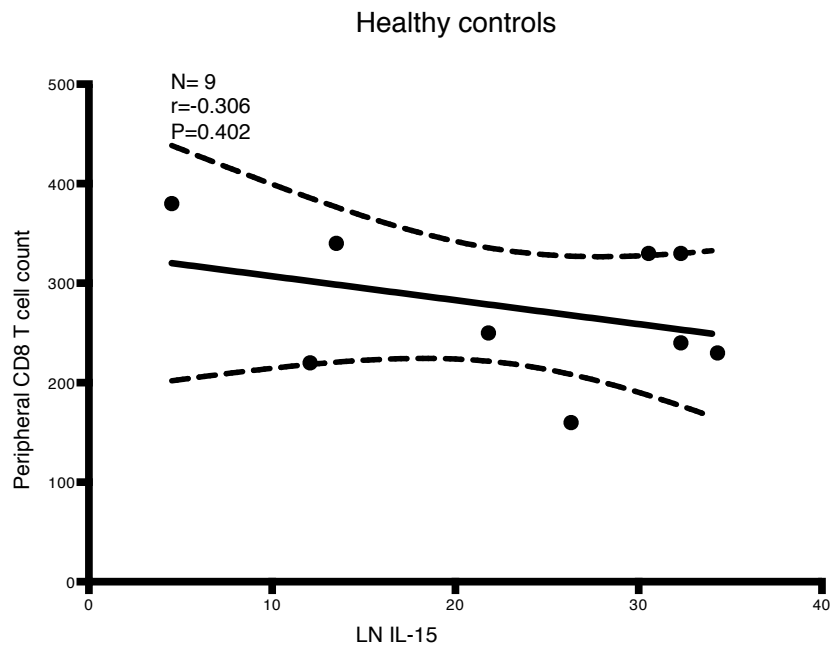

C

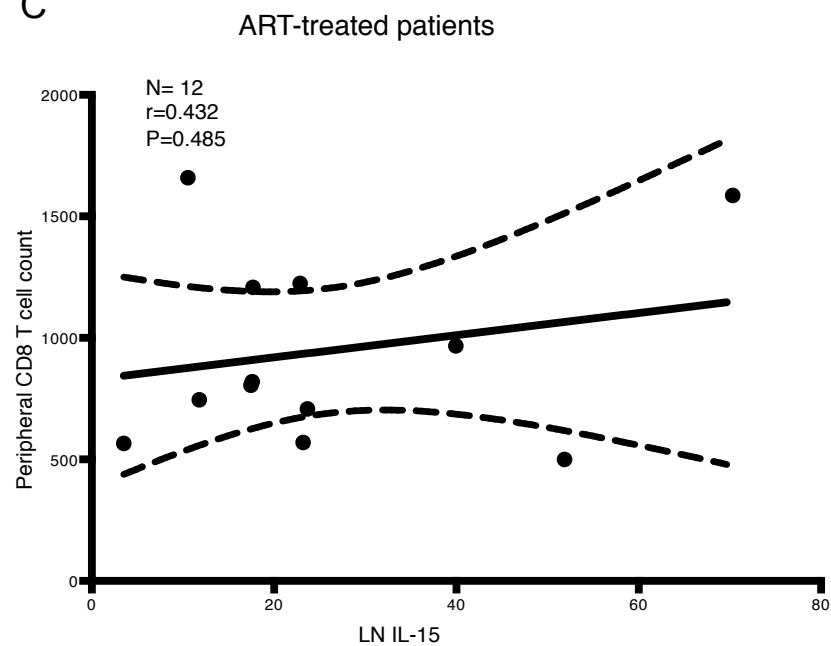

Supplement: sd1 [file 1]
